# Supplementary material for: The Use of Synthetic Electronic Health Record Data and Deep Learning to Improve Timing of High-Risk Heart Failure Surgical Intervention by Predicting Proximity to Catastrophic Decompensation
Source: PubMed Central journal article supplement (PMC8521851; doi:10.3389/fdgth.2020.576945), 2020-12-07

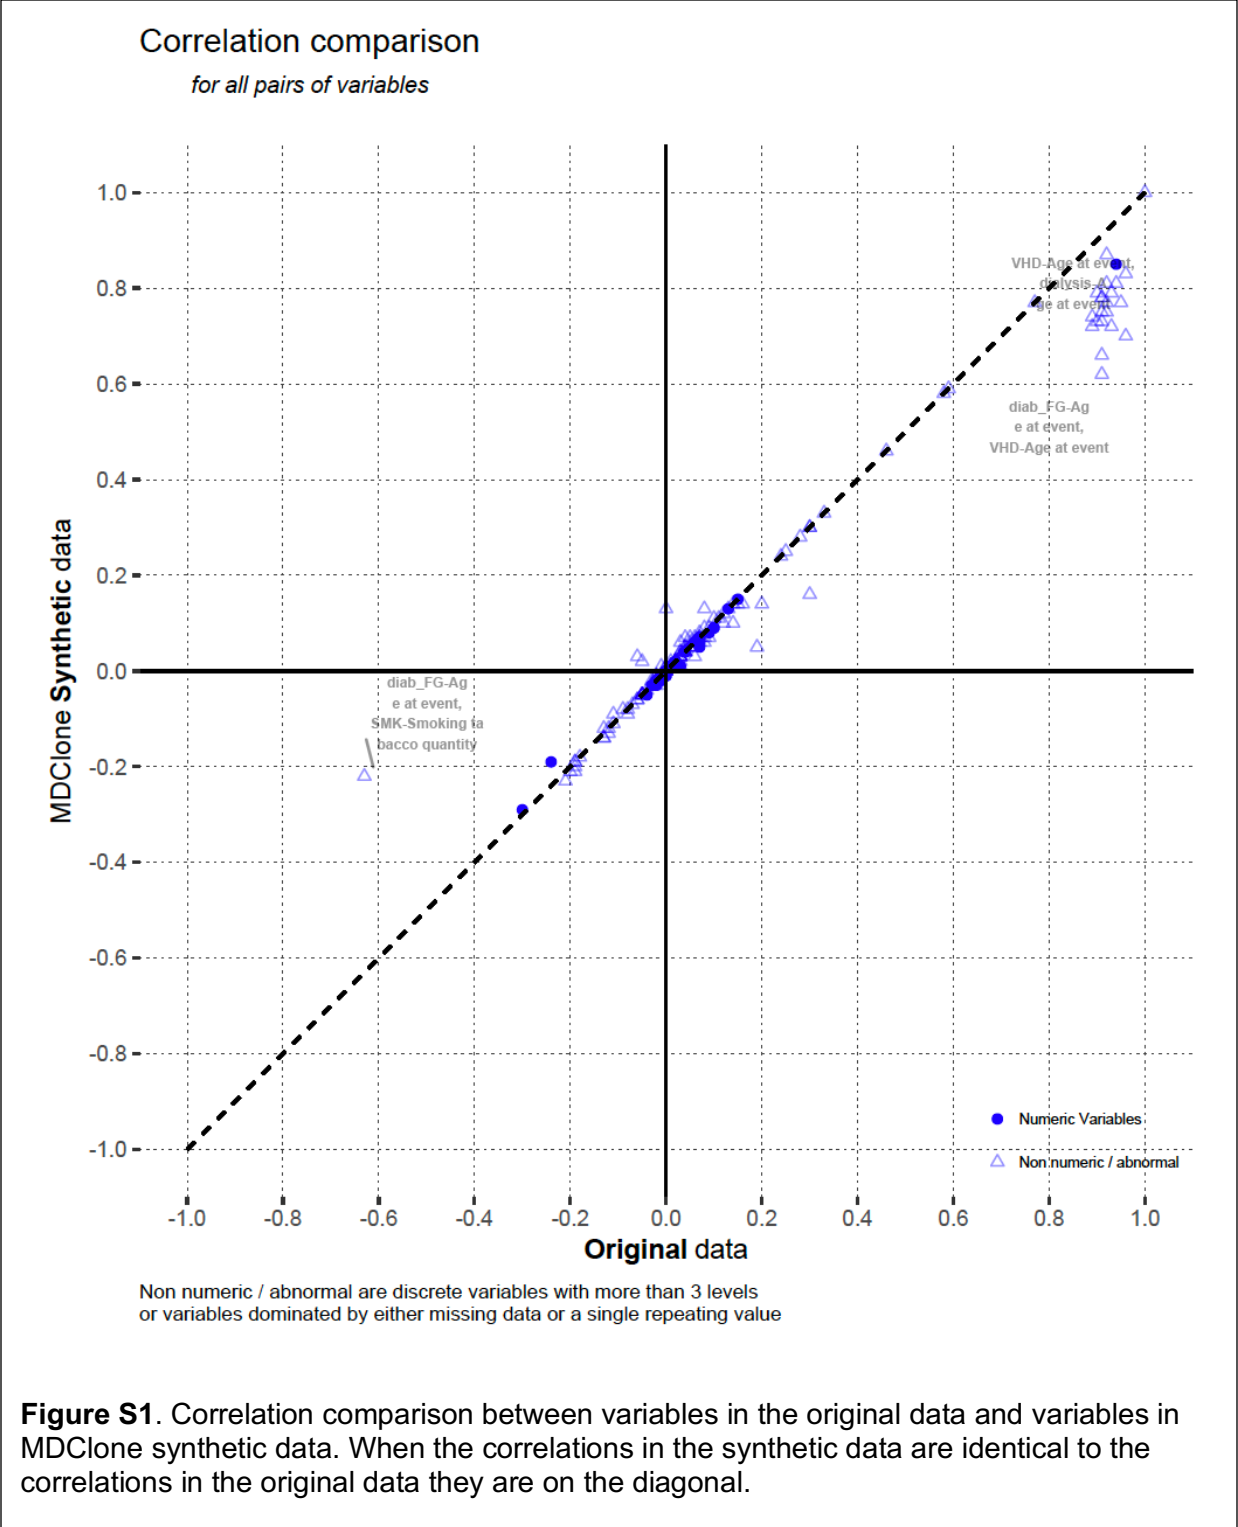

Supplement: Image_1.pdf [file Image_1.pdf]
